# Supplementary material for: Association between low-sodium salt intervention and long-term blood pressure changes is modified by ENaC genetic variation: a gene–diet interaction analysis in a randomized controlled trial
Source: Royal Society of Chemistry journal article supplement (doi:10.1039/d3fo02393a), 2023-01-01
Supplement: d3fo02393a1.pdf [file d3fo02393a1.pdf]

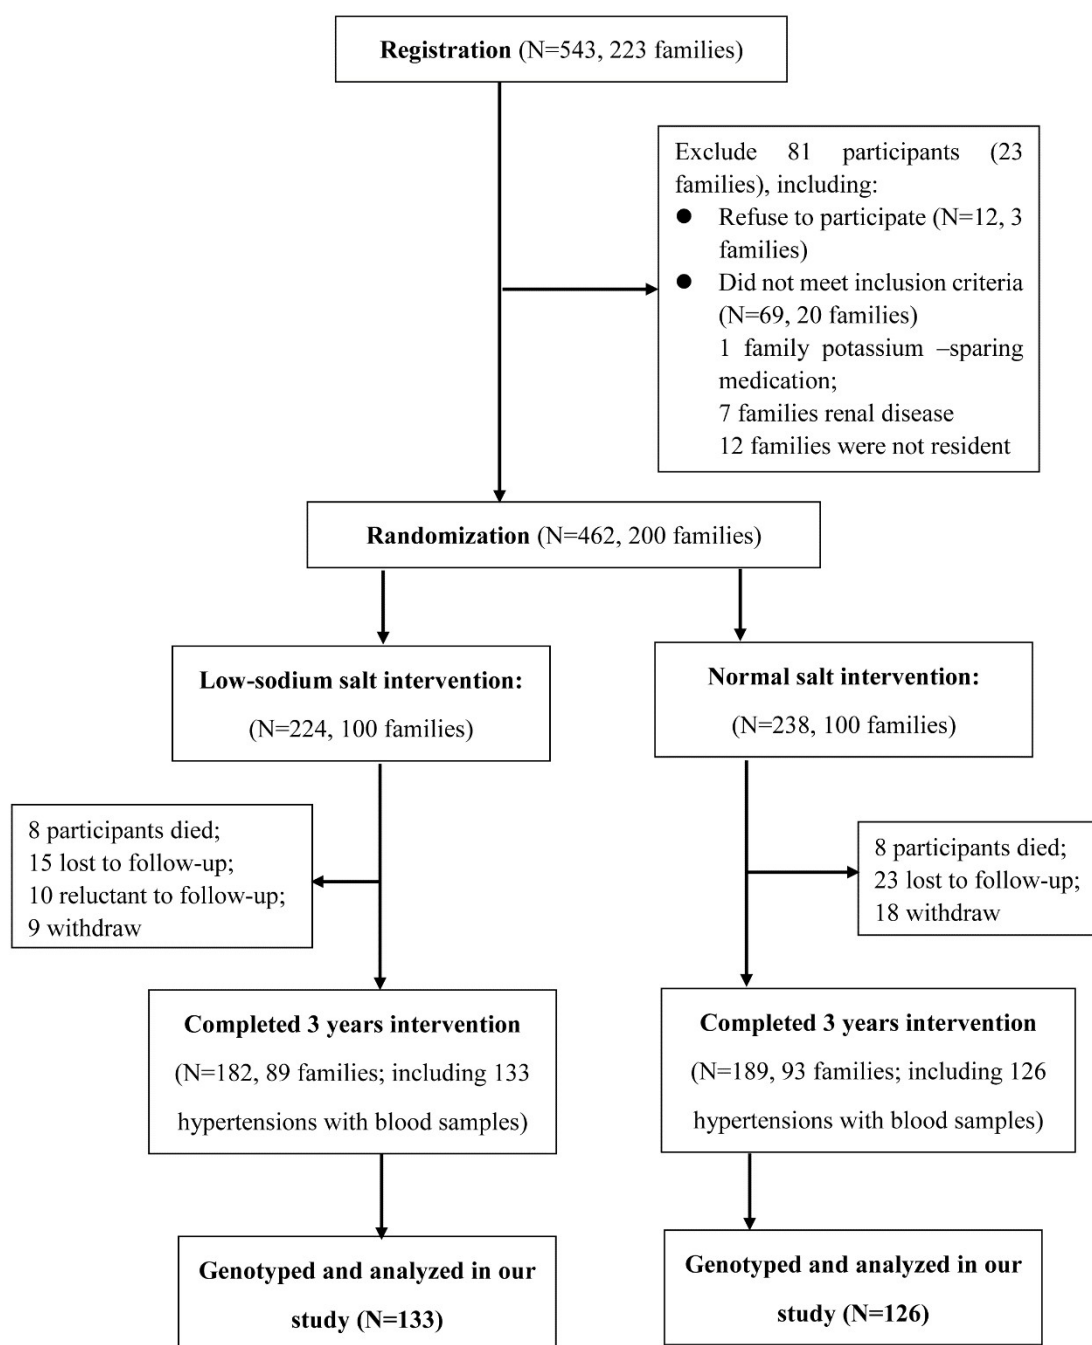

**Figure S1.** Flowchart of participant recruitment in our study

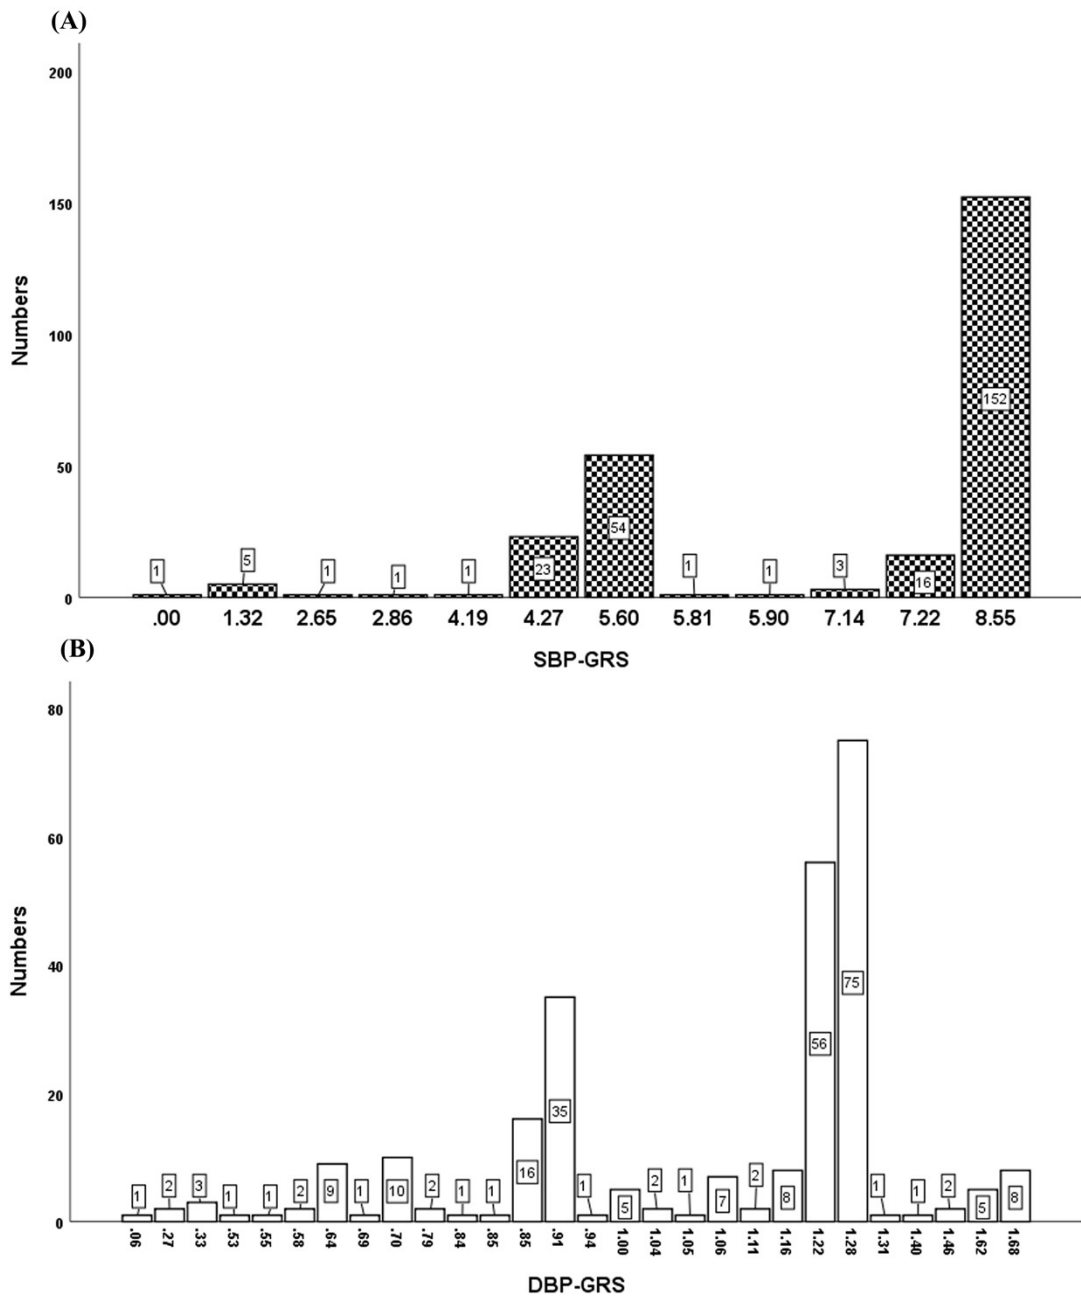

**Figure S2.** Distribution of GRS score. Figure S2A, distribution of SBP-GRS score; Figure S2B, distribution of DBP-GRS score. DBP, diastolic blood pressure; GRS, genetic risk score; SBP, systolic blood pressure.

**Table S1.** Information of the 13 polymorphisms genotyped and the association with baseline SBP/DBP among the study population

| Gene   | SNP <sup>a</sup> | Position        | Major/minor allele | MAF     | <i>P</i> value <sup>b</sup> |       |
|--------|------------------|-----------------|--------------------|---------|-----------------------------|-------|
|        |                  |                 |                    |         | SBP                         | DBP   |
| SCNN1A | rs4764586        | chr12: 6471071  | C>A                | A=0.404 | 0.549                       | 0.300 |
| SCNN1A | rs3782724        | chr12: 6466081  | A>G                | G=0.238 | 0.530                       | 0.140 |
| SCNN1A | rs2228576        | chr12: 6457062  | C>T                | T=0.490 | 0.983                       | 0.426 |
| SCNN1A | rs11542844       | chr12: 6464581  | C>T                | T=0.161 | 0.712                       | 0.657 |
| SCNN1B | rs7190829        | chr16: 23347304 | A>G                | G=0.202 | 0.922                       | 0.351 |
| SCNN1B | rs8055868        | chr16: 23348251 | G>A                | A=0.226 | 0.800                       | 0.264 |
| SCNN1G | rs4421986        | chr16: 23191250 | G>A                | A=0.060 | 0.587                       | 0.092 |
| SCNN1G | rs7404408        | chr16: 23196738 | C>T                | T=0.166 | 0.067                       | 0.058 |
| SCNN1G | rs5735           | chr16: 23200848 | T>C                | C=0.183 | 0.133                       | 0.136 |
| SCNN1G | rs4401050        | chr16: 23217402 | C>T                | T=0.084 | 0.975                       | 0.954 |
| SCNN1G | rs4499238        | chr16: 23221379 | C>T                | T=0.103 | 0.116                       | 0.077 |
| SCNN1G | rs4297681        | chr16: 23225041 | G>T                | T=0.079 | 0.944                       | 0.409 |
| SCNN1G | rs5728           | chr16: 23227362 | A>G                | G=0.192 | 0.967                       | 0.708 |

a: All polymorphisms were in Hardy-Weinberg equilibrium ( $P > 0.05$ ).

b: *P* value was calculated by generalized linear regression model included polymorphisms as allele model, adjusted with age.  $P < 0.20$  indicated possible significant association among study population. SNP, single nucleotide polymorphism; MAF, minor allele frequency.

**Table S2.** Polymorphisms information for genetic risk score construction

| SBP/DBP | SNP       | Risk allele | $\beta$ * |
|---------|-----------|-------------|-----------|
| SBP     | rs5735    | T           | 1.18      |
|         | rs7404408 | C           | 1.29      |
|         | rs4499238 | C           | 1.11      |
| DBP     | rs5735    | T           | 0.36      |
|         | rs7404408 | C           | 0.44      |
|         | rs4499238 | C           | 0.47      |
|         | rs3782724 | G           | 0.13      |
|         | rs4421986 | A           | 0.88      |

\*:  $\beta$  was derived from GenSalt Study. *Zhao et al. 2011*

**Table S3.** Baseline characteristics of participants by SBP/DBP-GRS groups

| Characteristics                   | Total                        | SBP-GRS        |                 |                | DBP-GRS             |                    |                |
|-----------------------------------|------------------------------|----------------|-----------------|----------------|---------------------|--------------------|----------------|
|                                   |                              | High<br>(8.55) | Low<br>(0~7.14) | <i>P</i> value | High<br>(1.22~1.68) | Low<br>(0.06~1.16) | <i>P</i> value |
| N                                 | 259                          | 152            | 107             |                | 148                 | 111                |                |
| Age (years)                       | 49.51±11.51                  | 49.38±11.11    | 49.69±12.10     | 0.831          | 49.63±10.38         | 49.35±12.90        | 0.853          |
| Gender                            |                              |                |                 | 0.941          |                     |                    | 0.943          |
|                                   | Male                         | 129 (49.8%)    | 76 (50.0%)      | 53 (49.5%)     |                     | 74 (50.0%)         | 55 (49.5%)     |
|                                   | Female                       | 130 (50.2%)    | 76 (50.0)       | 54 (50.5%)     |                     | 74 (50.0%)         | 56 (50.5%)     |
| BMI (kg/m <sup>2</sup> )          | 27.12±3.96                   | 27.62±4.15     | 26.41±3.58      | 0.015          | 27.69±4.06          | 26.35±3.71         | 0.007          |
| Smoking                           | 115 (44.4%)                  | 67 (44.1%)     | 48 (44.9%)      | 0.901          | 65 (43.9%)          | 50 (45.0%)         | 0.857          |
| Alcohol drinking                  | 98 (37.8%)                   | 57 (37.5%)     | 41 (38.3%)      | 0.894          | 57 (38.5%)          | 41 (36.9%)         | 0.796          |
| Family history of hypertension    | 149 (57.5%)                  | 92 (60.5%)     | 57 (53.3%)      | 0.245          | 90 (60.8%)          | 59 (53.2%)         | 0.217          |
| History of cardiovascular disease | 55 (21.2%)                   | 37 (24.3%)     | 18 (16.8%)      | 0.145          | 35 (22.0%)          | 19 (25.3%)         | 0.273          |
| Antihypertensive medication use   | 145 (56%)                    | 87 (57.6%)     | 58 (54.7%)      | 0.645          | 84 (56.8%)          | 59 (53.2%)         | 0.564          |
| SBP (mmHg)                        | 163.07±22.19                 | 164.91±23.09   | 160.45±20.66    | 0.112          | 165.11±23.00        | 160.35±20.85       | 0.087          |
| DBP (mmHg)                        | 96.22±11.89                  | 96.95±12.22    | 95.18±11.37     | 0.240          | 97.45±12.24         | 94.57±11.24        | 0.053          |
| Heart rate (bpm)                  | 81.07±11.71                  | 80.85±10.68    | 81.38±13.09     | 0.718          | 80.72±10.46         | 81.54±13.24        | 0.589          |
| TG (mmol/L)                       | 1.76±1.86                    | 1.81±1.80      | 1.69±1.95       | 0.630          | 1.82±1.18           | 1.69±1.92          | 0.603          |
| TC (mmol/L)                       | 5.26±1.21                    | 5.22±1.24      | 5.31±1.17       | 0.553          | 5.23±1.24           | 5.31±1.16          | 0.613          |
| HDL (mmol/L)                      | 1.64±0.43                    | 1.60±0.43      | 1.68±0.43       | 0.158          | 1.61±0.43           | 1.68±0.43          | 0.201          |
| LDL (mmol/L)                      | 2.52±0.79                    | 2.50±0.78      | 2.55±0.80       | 0.257          | 2.49±0.78           | 2.55±0.79          | 0.566          |
| Salt intervention                 |                              |                |                 | 0.133          |                     |                    | 0.315          |
|                                   | Low-sodium salt intervention | 133 (51.4%)    | 84 (55.3%)      | 49 (45.8%)     |                     | 80 (54.1%)         | 53 (47.7%)     |
|                                   | Normal salt intervention     | 126 (48.6%)    | 68 (44.7%)      | 58 (54.2%)     |                     | 68 (45.9%)         | 58 (52.3%)     |

Data were expressed as mean (SD) or n (%).

BMI, body mass index; DBP, diastolic blood pressure; GRS, genetic risk score; HDL, high-density lipoprotein; LDL, low-density lipoprotein ; SBP, systolic blood pressure; TC, total cholesterol; TG, triglyceride.

**Table S4.** Blood pressure levels by salt intervention group at baseline, 1 year, 2 years and 3 years

| Blood pressure     | SBP (mmHg)                   |                          |                | DBP (mmHg)                   |                          |                |
|--------------------|------------------------------|--------------------------|----------------|------------------------------|--------------------------|----------------|
|                    | Low-sodium salt intervention | Normal salt intervention | <i>P</i> value | Low-sodium salt intervention | Normal salt intervention | <i>P</i> value |
| At each time point |                              |                          |                |                              |                          |                |
| Baseline           | 166.00±23.15                 | 159.98±20.77             | 0.003          | 97.67±11.32                  | 94.69±12.32              | 0.018          |
| 1 year             | 149.62±20.32                 | 149.63±24.46             | 0.599          | 91.33±12.57                  | 88.86±13.34              | 0.327          |
| 2 year             | 138.72±18.88                 | 148.18±22.34             | <0.001         | 85.96±9.50                   | 90.43±11.30              | <0.001         |
| 3 year             | 148.75±20.72                 | 155.05±24.33             | 0.049          | 91.35±12.47                  | 93.83±14.61              | 0.056          |

SBP/DBP was described as mean ± SD.

*P* value was analyzed by generalized linear regression model adjusted with age, gender, antihypertensive medication use, alcohol drinking, family history of hypertension, TC, HDL, baseline SBP and DBP (except for baseline blood pressure level).

DBP, diastolic blood pressure; GRS, genetic risk score; HDL, high-density lipoprotein; SBP, systolic blood pressure; TC, total cholesterol.

**Table S5.** Blood pressure levels by SBP/DBP-GRS at baseline, 1 year, 2 years and 3years

| Blood pressure<br>(mmHg) | SBP-GRS      |              |                | DBP-GRS     |             |                |
|--------------------------|--------------|--------------|----------------|-------------|-------------|----------------|
|                          | High         | Low          | <i>P</i> value | High        | Low         | <i>P</i> value |
| SBP/DBP                  |              |              |                |             |             |                |
| Baseline                 | 164.91±23.09 | 160.45±20.66 | 0.416          | 97.45±12.24 | 94.57±11.25 | 0.300          |
| 1 year                   | 151.09±23.21 | 147.61±21.29 | 0.572          | 97.69±12.33 | 88.13±13.59 | 0.200          |
| 2 year                   | 143.90±20.93 | 142.50±21.49 | 0.704          | 88.86±10.75 | 87.16±10.44 | 0.358          |
| 3 year                   | 152.97±22.89 | 150.17±22.49 | 0.402          | 93.55±14.57 | 91.23±12.08 | 0.311          |

SBP/DBP was described as mean ± SD.

*P* value was analyzed by generalized linear regression model adjusted with age, gender, BMI, antihypertensive medication use and salt intervention groups.

DBP, diastolic blood pressure; GRS, genetic risk score; SBP, systolic blood pressure.

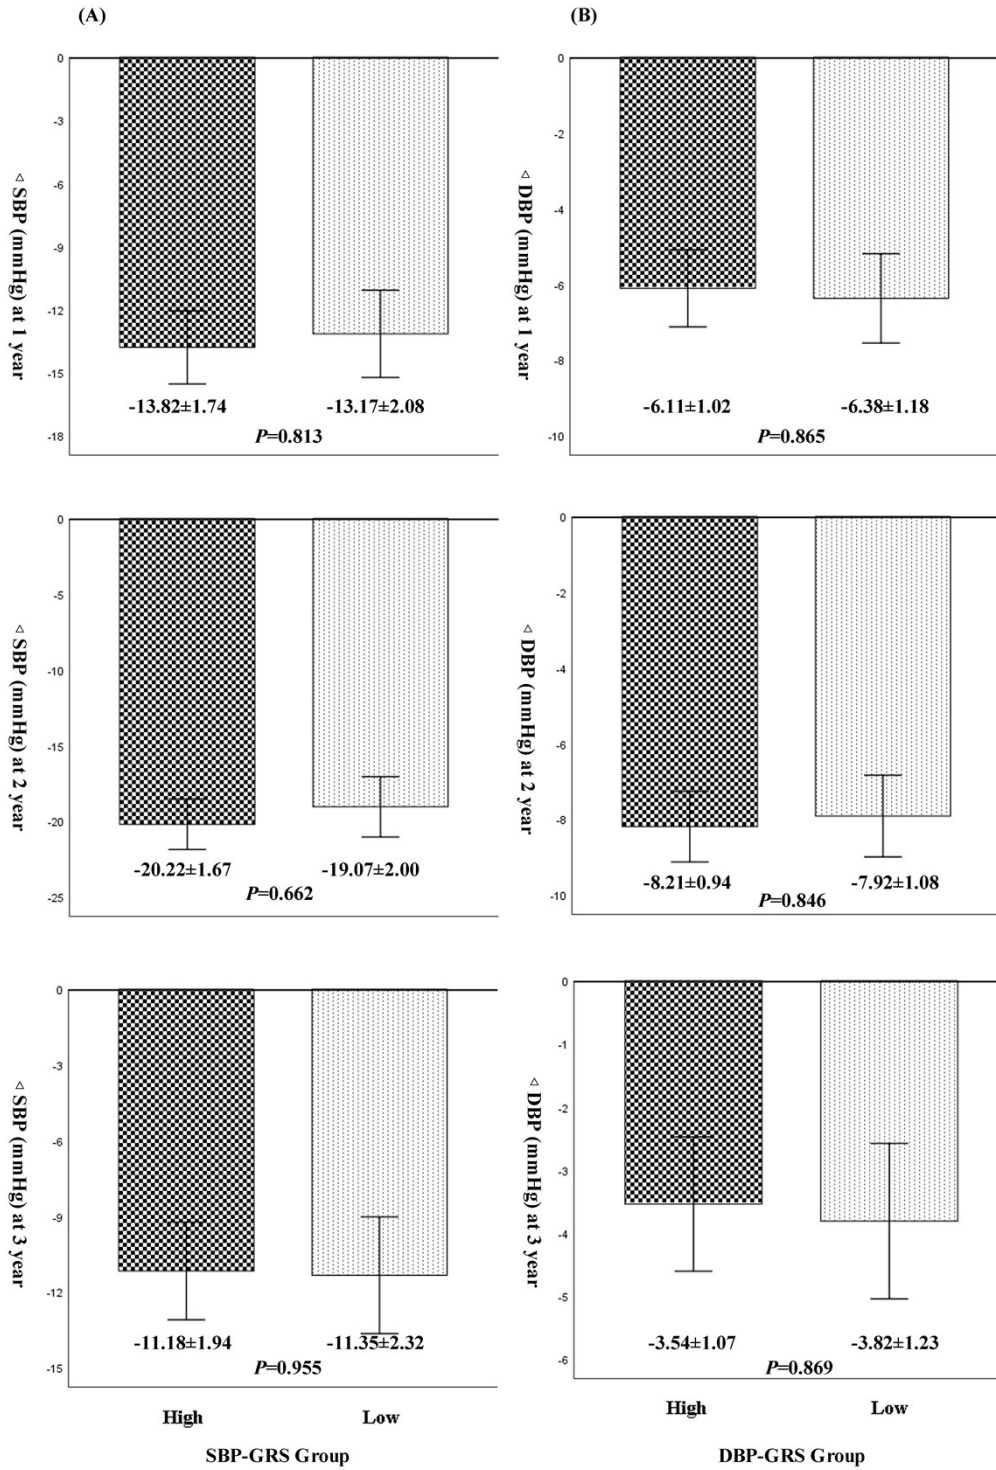

**Figure S3.** Changes in blood pressures by SBP/DBP-GRS groups at 1 year, 2 years and 3 years. Figure S3A, SBP changes ( $\Delta$ SBP) at each time by SBP-GRS group; Figure S3B, DBP changes ( $\Delta$ DBP) at each time by DBP-GRS group.  $\Delta$ SBP=SBP at follow-up visit – SBP at baseline;  $\Delta$ DBP=DBP at follow-up visit–DBP at baseline; Blood pressure changes were expressed as estimate marginal means $\pm$  standard error of mean (SEM) and *P* value was calculated with general linear regression model, adjusted with age, gender, BMI, antihypertensive medication use and salt intervention groups. DBP, diastolic blood pressure; GRS, genetic risk score; SBP, systolic blood pressure.



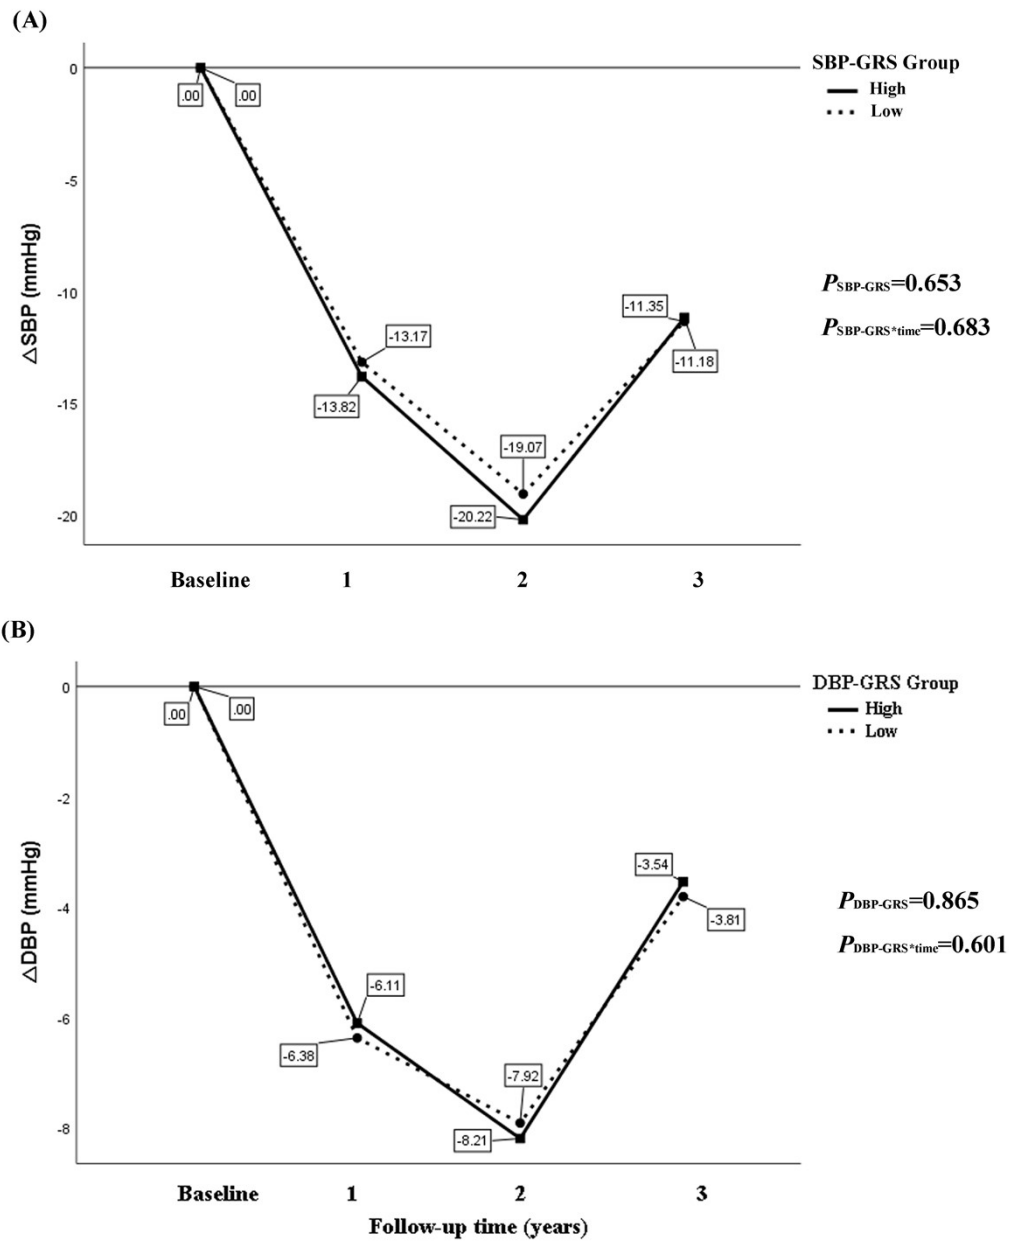

**Figure S4.** Trajectory of changes in blood pressure by SBP/DBP-GRS groups over 3 years. Figure S4A, 3-year trajectory of SBP change; Figure S4B, 3-year trajectory of DBP change.  $\Delta\text{SBP}=\text{SBP}$  at follow-up visit-SBP at baseline;  $\Delta\text{DBP}=\text{DBP}$  at follow-up visit-DBP at baseline;  $P_{\text{SBP/DBP-GRS}}$  value was calculated with a generalized mixed model, adjusted with age, gender, BMI, antihypertensive medication use and salt intervention groups and  $P_{\text{SBP/DBP-GRS*time}}$  was included in model as interaction terms. DBP, diastolic blood pressure; GRS, genetic risk score; SBP, systolic blood pressure.

Table S6. Interaction effect of salt intervention and SBP-GRS on SBP changes over 3 years

| SBP-GRS group | Salt intervention group | N  | $\Delta$ SBP (95% CI)     |
|---------------|-------------------------|----|---------------------------|
| High          | Low-sodium salt         | 84 | -18.77 (-21.94 to -15.61) |
| High          | Normal salt             | 68 | -9.58 (-13.09 to -6.07)   |
| Low           | Low-sodium salt         | 49 | -15.71 (-19.82 to -11.61) |
| Low           | Normal salt             | 58 | -14.62 (-18.38 to -10.86) |

$\Delta$ SBP: SBP changes=SBP at follow-up visit-SBP at baseline, shown as estimate marginal means with 95% confidence interval (CI) was calculated by a generalized mixed model, age, gender, antihypertensive medication use, alcohol drinking, family history of hypertension, TC, HDL, baseline SBP and DBP. DBP, diastolic blood pressure; GRS, genetic risk score; HDL, high-density lipoprotein; SBP, systolic blood pressure; TC, total cholesterol.

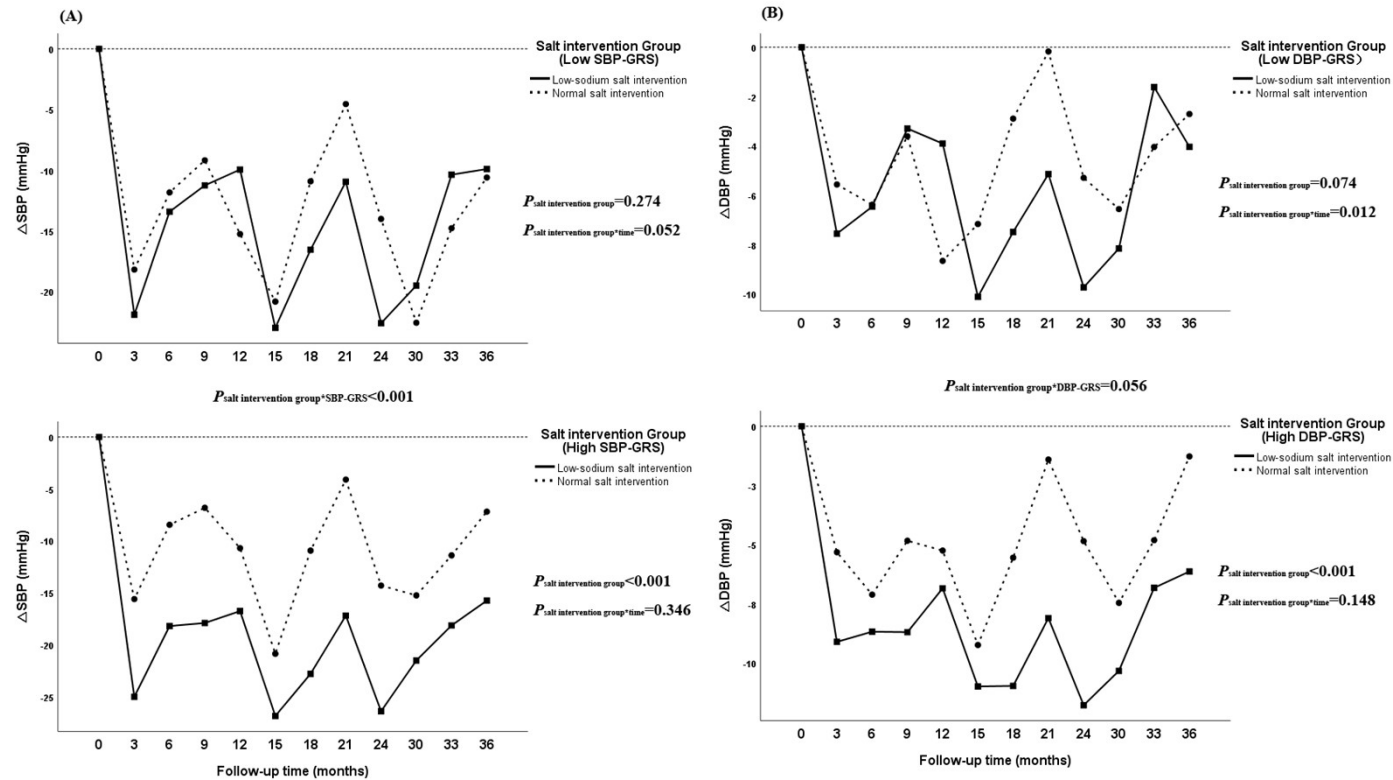

Figure S5. Trajectory of changes in blood pressure by SBP/DBP-GRS and salt intervention groups at 12 follow-up visits. Figure S1A, 3-year trajectory of SBP change in low-sodium salt and normal salt intervention; Figure S1B, 3-year trajectory of DBP change in low-sodium salt and normal salt intervention.  $\Delta$ SBP=SBP at follow-up visit-SBP at baseline;  $\Delta$ DBP=DBP at follow-up visit-DBP at baseline;  $P_{\text{SBP/DBP-GRS}}$  value was calculated with a generalized mixed model, adjusted with adjusted with age, gender, antihypertensive medication use, alcohol drinking, family history of hypertension, TC, HDL, baseline SBP and DBP,  $P_{\text{salt intervention group}} \beta_{\text{SBP/DBP-GRS}}$  and  $P_{\text{salt intervention group}} \beta_{\text{time}}$  were included in model as interaction terms. DBP, diastolic blood pressure; GRS, genetic risk score; HDL, high-density lipoprotein; SBP, systolic blood pressure; TC, total cholesterol.
